# Supplementary material for: Formation of snowman-like Pt/Pd thin film and Pt/Pd/reduced-graphene oxide thin film at liquid–liquid interface by use of organometallic complexes, suitable for methanol fuel cells
Source: Royal Society of Chemistry journal article supplement (doi:10.1039/c4ra01625d), 2014-01-01
Supplement: c4ra01625d1.pdf [file c4ra01625d1.pdf]

## Electronic Supplementary Information (ESI)

### **Formation of snowman-like Pt/Pd thin film and Pt/Pd/reduced-graphene oxide thin film at liquid- liquid interface by using of organometallic complexes, suitable for methanol fuel cell**

S. Jafar Hoseini\*, Mehrangiz Bahrami and Modarres Dehghani

Graphene oxide was prepared using modified Hummers method from flake graphite<sup>50-52</sup> (Merck Company). Briefly, a flask containing 1 g of graphite and 0.75 g of NaNO<sub>3</sub>, was placed in the ice-water bath. 75 ml of H<sub>2</sub>SO<sub>4</sub> was added with stirring and then 4.5 g of KMnO<sub>4</sub> were slowly added over about 1 h. After the mixture was stirred vigorously for 5 days at room temperature, 140 ml 5 % H<sub>2</sub>SO<sub>4</sub> aqueous solution was added over about 1 h with stirring , and the temperature was kept at 98 °C. The temperature was reduced to 60 °C, 3 ml of H<sub>2</sub>O<sub>2</sub> (30 wt% aqueous solution) was added, and the mixture was stirred for 2 h at room temperature. As-prepared graphene oxide was suspended in ultra-pure water to give a brown dispersion, which was subjected to dialysis to completely remove residual salts and acids. Resulting purified graphene oxide powders were collected by centrifugation and air-dried. Graphene oxide powders were dispersed in water to create 0.05 wt% dispersion. Then, the dispersion was exfoliated through ultrasonication for 1 h, which the bulk graphene oxide powders were transformed into GO nanoplatelets.

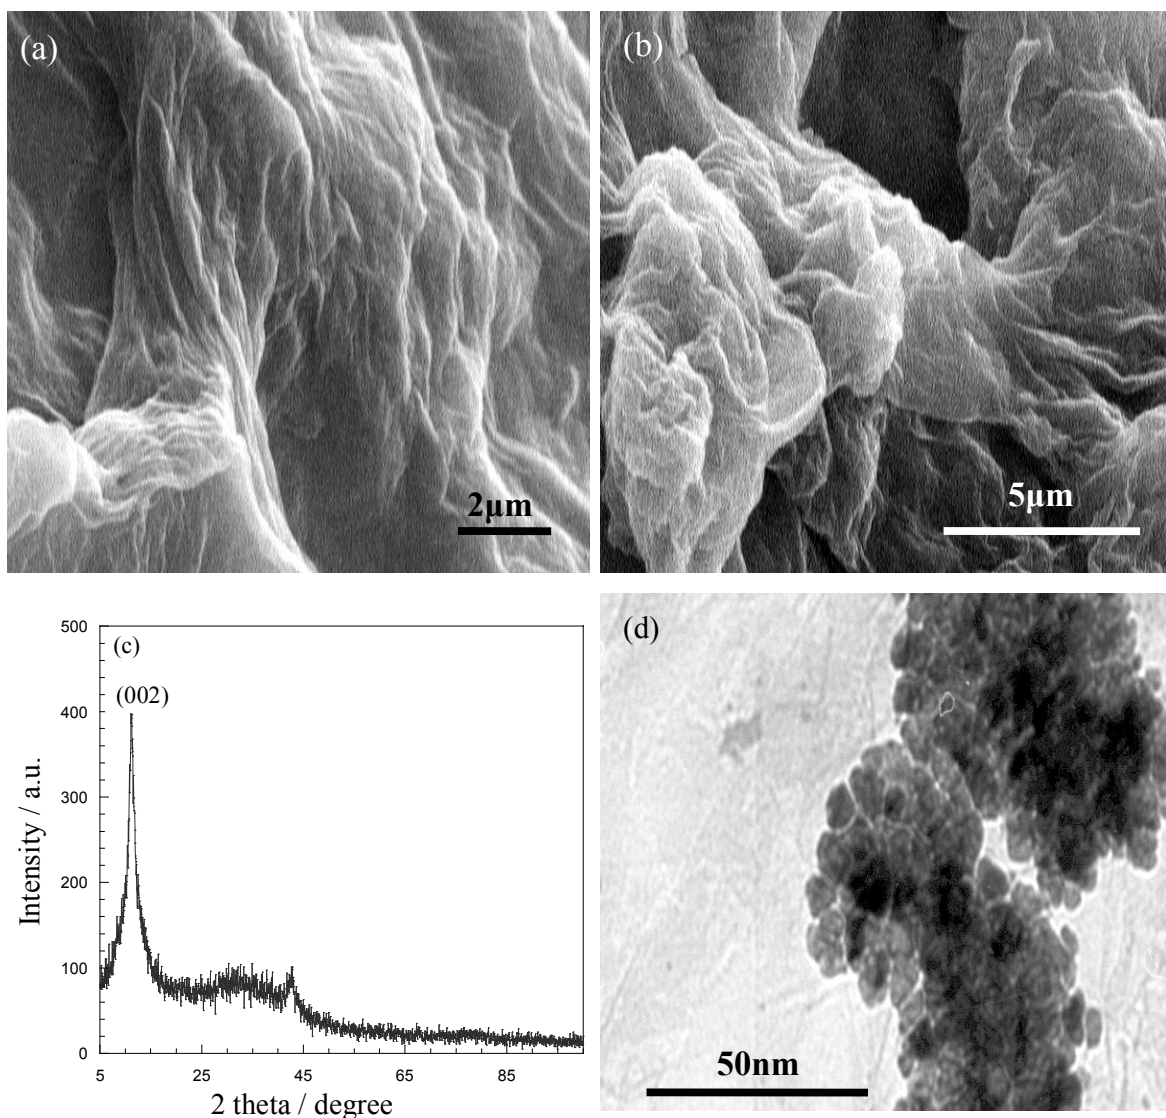

**Fig. S1** (a, b) SEM images of the GO, (c) X-Ray diffraction pattern of GO, (d) TEM image of GO.
